# Supplementary material for: Structural Basis for PPARs Activation by The Dual PPARα/γ Agonist Sanguinarine: A Unique Mode of Ligand Recognition
Source: MDPI journal article supplement (doi:10.3390/molecules26196012), 2021-10-03
Supplement: s1 [file s1]

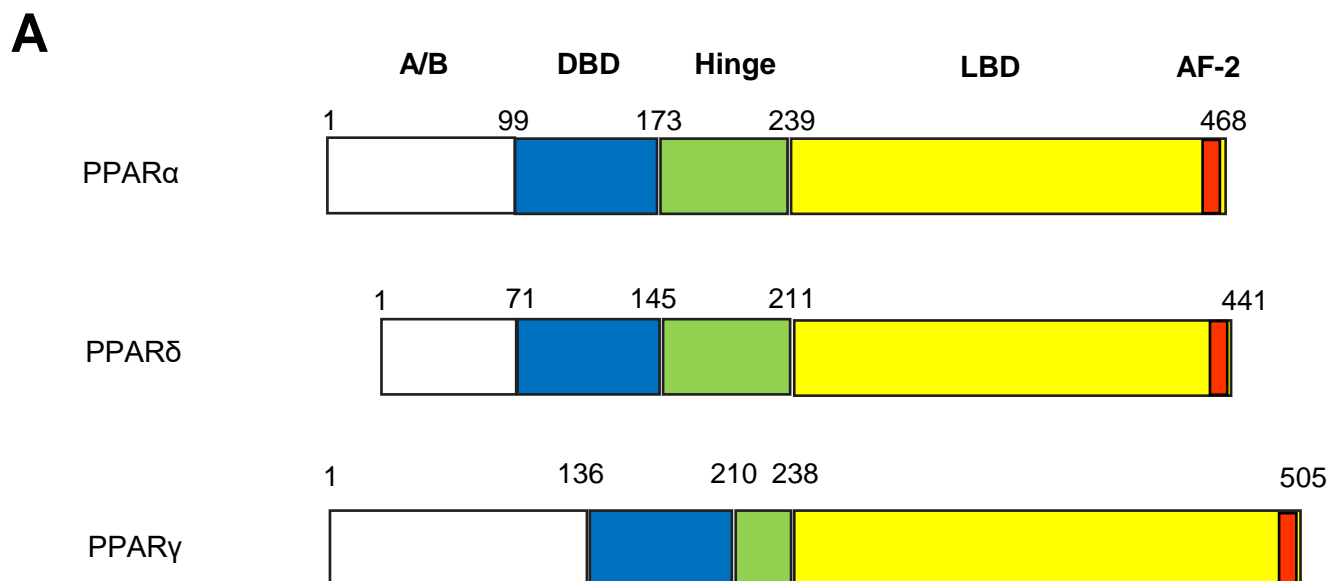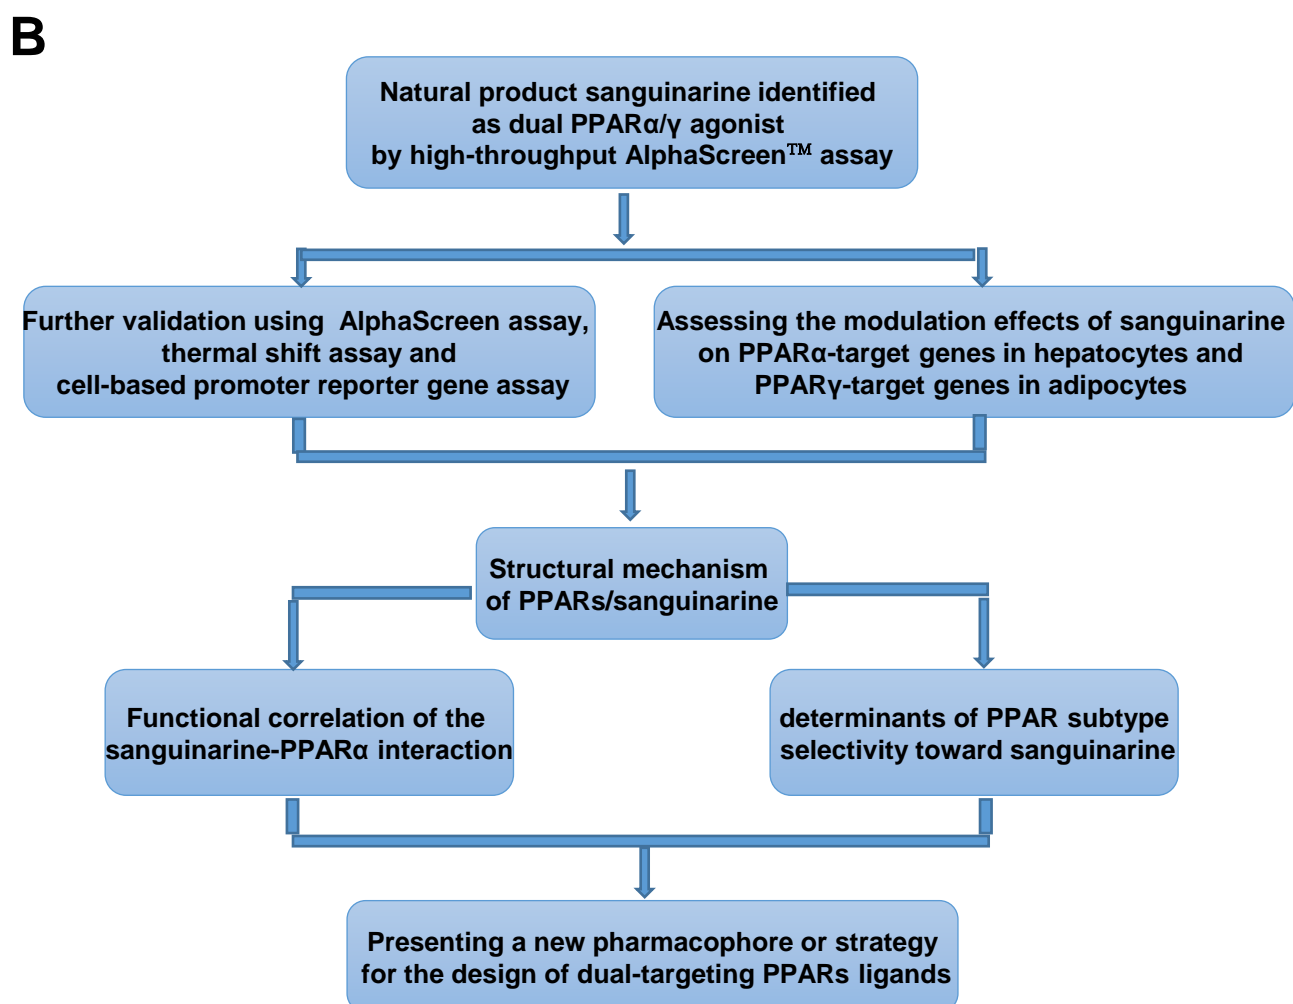

**Figure S1.** (A) Schematic diagram showing functional domain of PPARs. (B) General workflow overview.

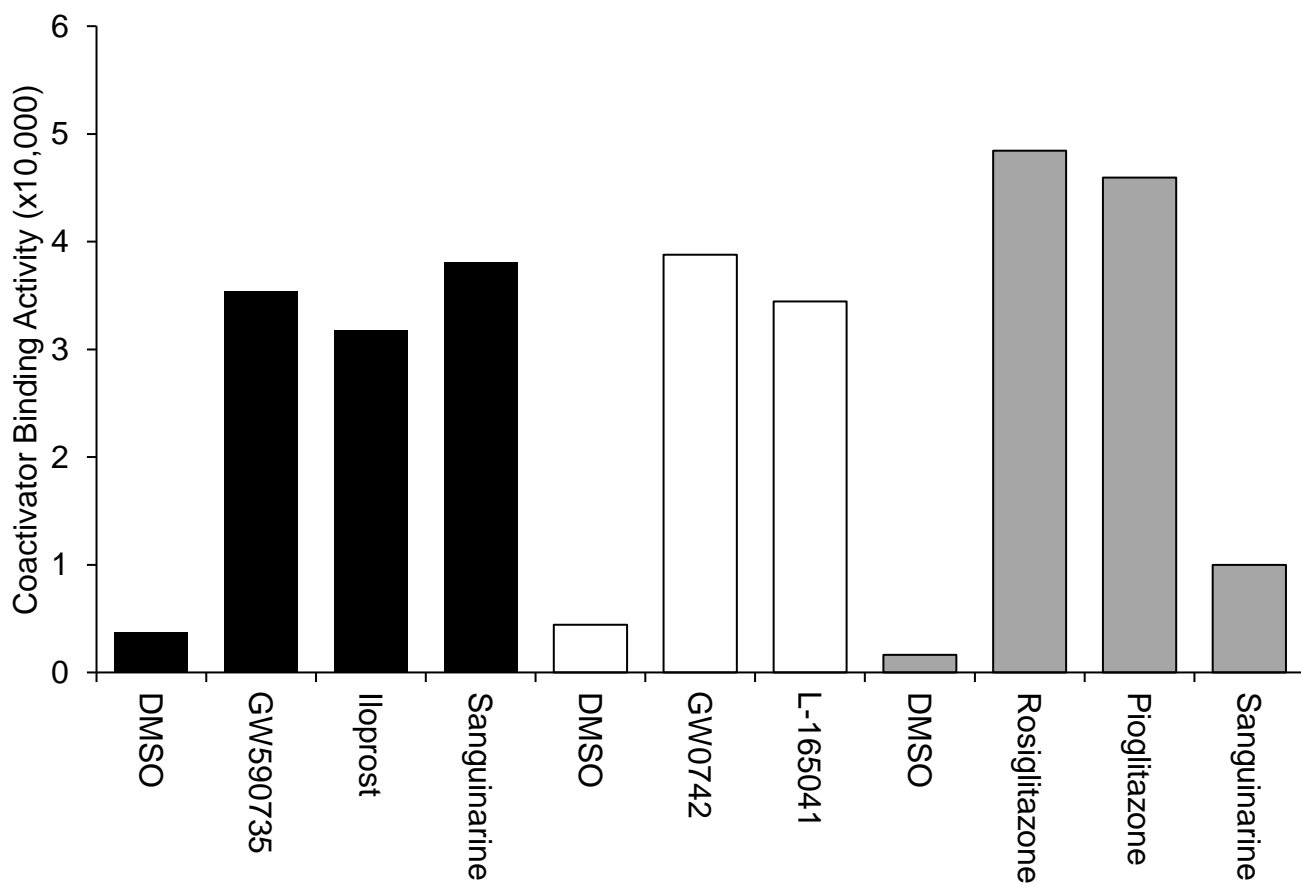

**Figure S2.** The binding of the biotinylated SRC1-2 peptide to PPARs LBD in response to ligands from the Enzo Natural Compound library (502 compounds) was determined by AlphaScreen™ assays. The experiments were conducted with approximately 20–40 nM receptor LBD and 20 nM biotinylated co-factor peptides in the presence of 5  $\mu$ M ligands. The compounds that induced more than 2-fold co-activator binding activity of PPARs LBD are shown. PPAR $\alpha$ , black bars; PPAR $\delta$ , white bars; PPAR $\gamma$ , gray bars.

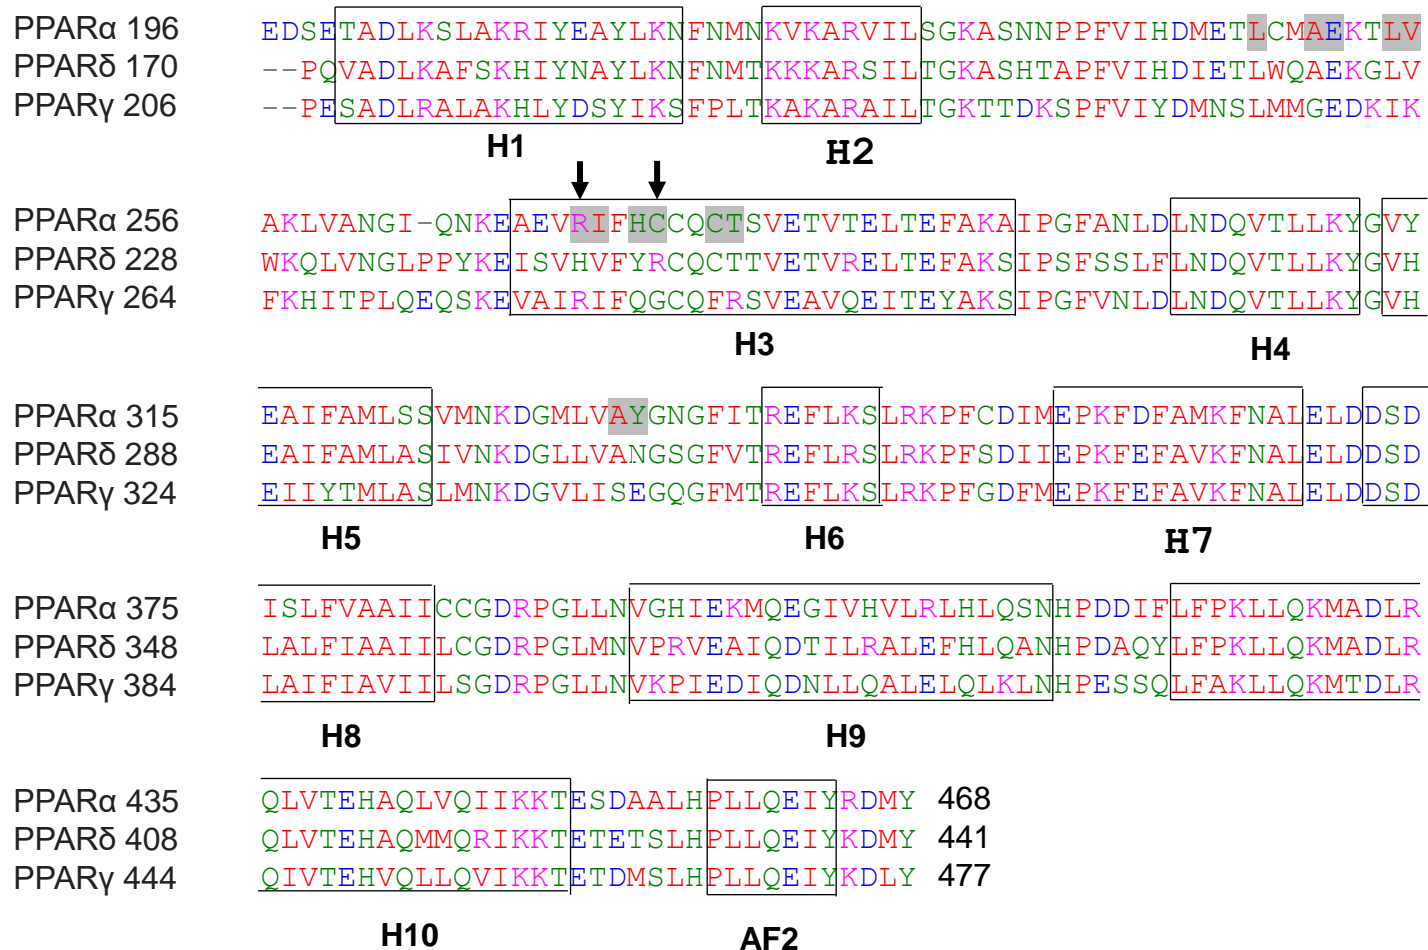

**Figure S3.** Sequence alignment of human PPAR $\alpha$  LBD with human PPAR $\delta$  and PPAR $\gamma$  LBDs. The secondary structural elements are boxed and annotated below the sequences with residues colored according to their sidechain property. Residues with small and hydrophobic sidechains are in red, acidic sidechains in blue, basic sidechains in magenta, and hydroxyl and amide sidechains in green. And the PPAR $\alpha$  residues that interact with sanguinarine are shaded in gray, the residues that determine the sanguinarine binding selectivity are noted with arrows.

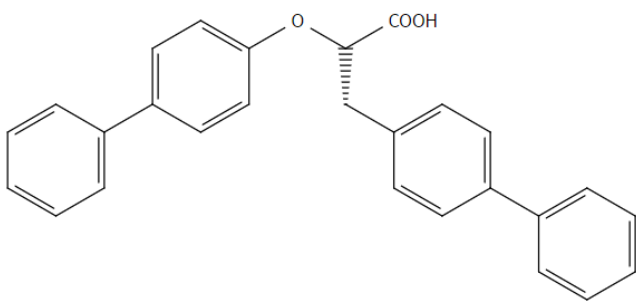

LJ 570

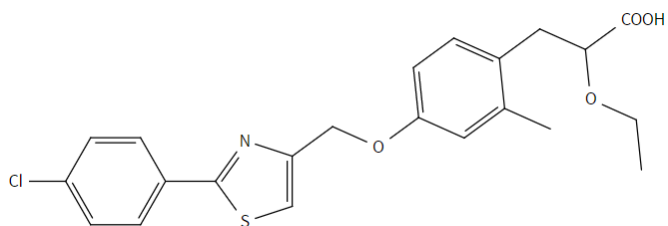

24

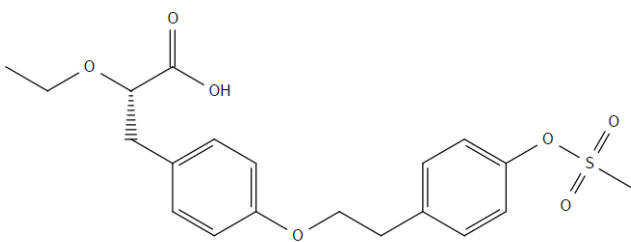

Tesaglitazar

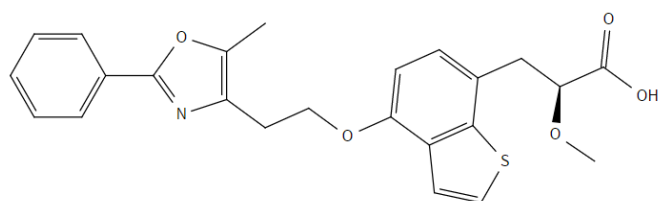

Aleglitazar

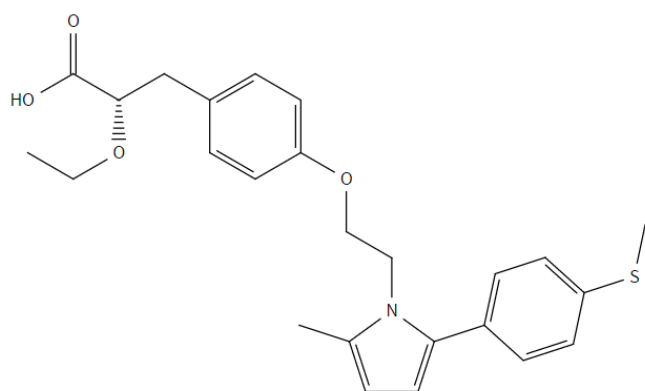

Saroglitazar

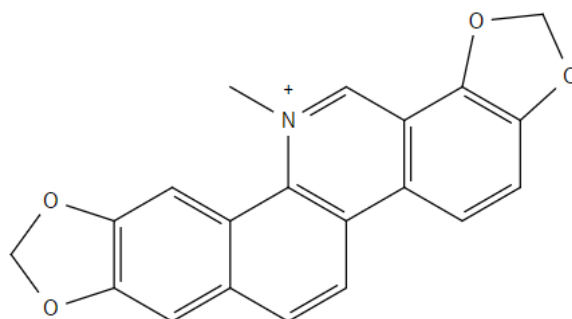

Sanguinarine

**Figure S4.** Chemical structures of dual PPAR $\alpha/\gamma$  agonists.

**Table S1.** Data collection and refinement statistics

| Parameters                               | PPAR $\alpha$ /Sanguinarine/SRC1-2 |
|------------------------------------------|------------------------------------|
| <b>Data collection</b>                   |                                    |
| Space group                              | P212121                            |
| Cell dimensions                          |                                    |
| a,b,c (Å)                                | 45.55 61.50 98.48                  |
| $\alpha,\beta,\gamma(^{\circ})$          | 90.000 90.000 90.000               |
| Resolution(Å)                            | 44.26-2.76(2.91-2.76) <sup>1</sup> |
| Rmerge <sup>2</sup>                      | 0.116(0.424)                       |
| I/ $\sigma$                              | 13.4(5.8)                          |
| Completeness (%)                         | 99.9(100)                          |
| Redundancy                               | 7.0(7.3)                           |
| <b>Refinement</b>                        |                                    |
| Resolution (Å)                           | 44.30-2.76                         |
| No.reflections                           | 7786                               |
| Rwork <sup>3</sup> /Rfree <sup>4</sup> % | 19.09/26.07                        |
| No.atoms                                 |                                    |
| Protein                                  | 2153                               |
| Ligand/ion                               | 25                                 |
| Water                                    | 53                                 |
| B factors (Å <sup>2</sup> )              |                                    |
| Protein                                  | 45.12                              |
| Ligand/ion                               | 34.90                              |
| Water                                    | 35.97                              |
| R.M.S.D                                  |                                    |
| Bond lengths (Å)                         | 0.0065                             |
| Bond angles ( $^{\circ}$ )               | 1.4349                             |

<sup>1</sup> Values in parenthesis are for highest-resolution shell.

<sup>2</sup>  $R_{\text{merge}} = \frac{\sum_{\text{hkl}} \sum_i |I_i - \langle I \rangle|}{\sum_{\text{hkl}} \sum_i I_i}$  where  $I_i$  is the intensity of a reflection i of the group represented by the unique reflection hkl, and  $\langle I \rangle$  is the average intensity of the group represented by reflection hkl.

<sup>3</sup>  $3R_{\text{work}} = \frac{\sum |F_{\text{obs}} - F_{\text{calc}}|}{\sum |F_{\text{obs}}|}$  where  $F_{\text{obs}}$  and  $F_{\text{calc}}$  are the observed and calculated structure factor amplitudes, respectively.

<sup>4</sup>  $R_{\text{free}}$  is calculated using the same equation as that for  $R_{\text{work}}$  but 5% of reflections were chosen randomly and omitted from the refinement.
